# Supplementary material for: Bundles Prevent Surgical Site Infections After Colorectal Surgery: Meta-analysis and Systematic Review
Source: Springer Nature journal article supplement (doi:10.1007/s11605-017-3465-3), 2017-06-15
Supplement: MOESM2 [file 12447884]

Supplement 2: Downs and Black Quality Assessment Of Published Studies

| First Author, Year | Reporting | External validity | Internal validity bias | Internal validity-selection bias | Sufficiently powered? | Total |
| --- | --- | --- | --- | --- | --- | --- |
| Anthony, 2011 | 10 | 3 | 7 | 5 | Yes | 25 |
| Benlice 2016 | 10 | 3 | 5 | 4 | Yes | 22 |
| Berenguer, 2010 | 8 | 3 | 5 | 3 | No | 19 |
| Bert, 2016 | 10 | 3 | 5 | 3 | Yes | 21 |
| Bull, 2011 | 7 | 3 | 4 | 2 | No | 16 |
| Cima, 2013 | 10 | 3 | 5 | 1 | No | 19 |
| Connolly, 2016 | 9 | 3 | 5 | 4 | Yes | 21 |
| Crolla, 2012 | 9 | 3 | 5 | 2 | No | 19 |
| DeHaas, 2016 | 7 | 3 | 4 | 3 | Yes | 17 |
| Forbes, 2008 | 9 | 3 | 5 | 3 | No | 20 |
| Ghuman, 2015 | 10 | 3 | 4 | 3 | No | 20 |
| Hawn, 2011 | 8 | 3 | 5 | 4 | UTD | 20 |
| Hechenbleikner, 2015 | 9 | 3 | 5 | 4 | UTD | 21 |
| Hedrick, 2007-1 | 8 | 3 | 5 | 4 | No | 20 |
| Hedrick, 2007-2 | 10 | 3 | 5 | 3 | No | 21 |
| Hewitt, 2017 | 9 | 3 | 4 | 4 | Yes | 20 |
| Jaffe, 2016 | 7 | 3 | 4 | 3 | Yes | 17 |
| Keenan, 2014 | 9 | 3 | 5 | 5 | Yes | 22 |
| Keenan, 2015 | 10 | 3 | 5 | 5 | Yes | 23 |
| Kwaan, 2016 | 9 | 3 | 6 | 5 | **Yes** | 23 |
| Larochelle, 2011 | 6 | 3 | 4 | 4 | UTD | 17 |
| Liau, 2010 | 9 | 3 | 5 | 2 | Yes | 19 |
| Lutifiyya, 2012 | 9 | 3 | 5 | 2 | Yes | 19 |
| Pastor, 2010 | 10 | 3 | 6 | 4 | No | 23 |
| Perez-Blanco, 2015 | 9 | 3 | 4 | 4 | No | 20 |
| Reames 2015 | 10 | 3 | 5 | 4 | No | 22 |
| Rumberger, 2016 | 7 | 3 | 4 | 3 | No | 17 |
| Serra-Aracil, 2011 | 10 | 3 | 5 | 4 | UTD | 22 |
| Tanner, 2016 | 10 | 3 | 6 | 4 | No | 23 |
| Thompson, 2011 | 10 | 3 | 6 | 4 | UTD | 23 |
| Tillman, 2013 | 8 | 3 | 6 | 4 | No | 21 |
| Waits, 2014 | 9 | 3 | 6 | 5 | No | 23 |
| Wick, 2008 | 10 | 3 | 6 | 4 | UTD | 23 |
| Wick, 2012 | 10 | 3 | 5 | 4 | No | 22 |
| Yamamoto, 2015 | 10 | 3 | 4 | 4 | No | 21 |
